# Supplementary material for: Enhanced Electron Uptake and Methane Production by Corrosive Methanogens during Electromethanogenesis
Source: MDPI journal article supplement (doi:10.3390/microorganisms10112237), 2022-11-12
Supplement: s1 [file s1]

## Supplementary Materials

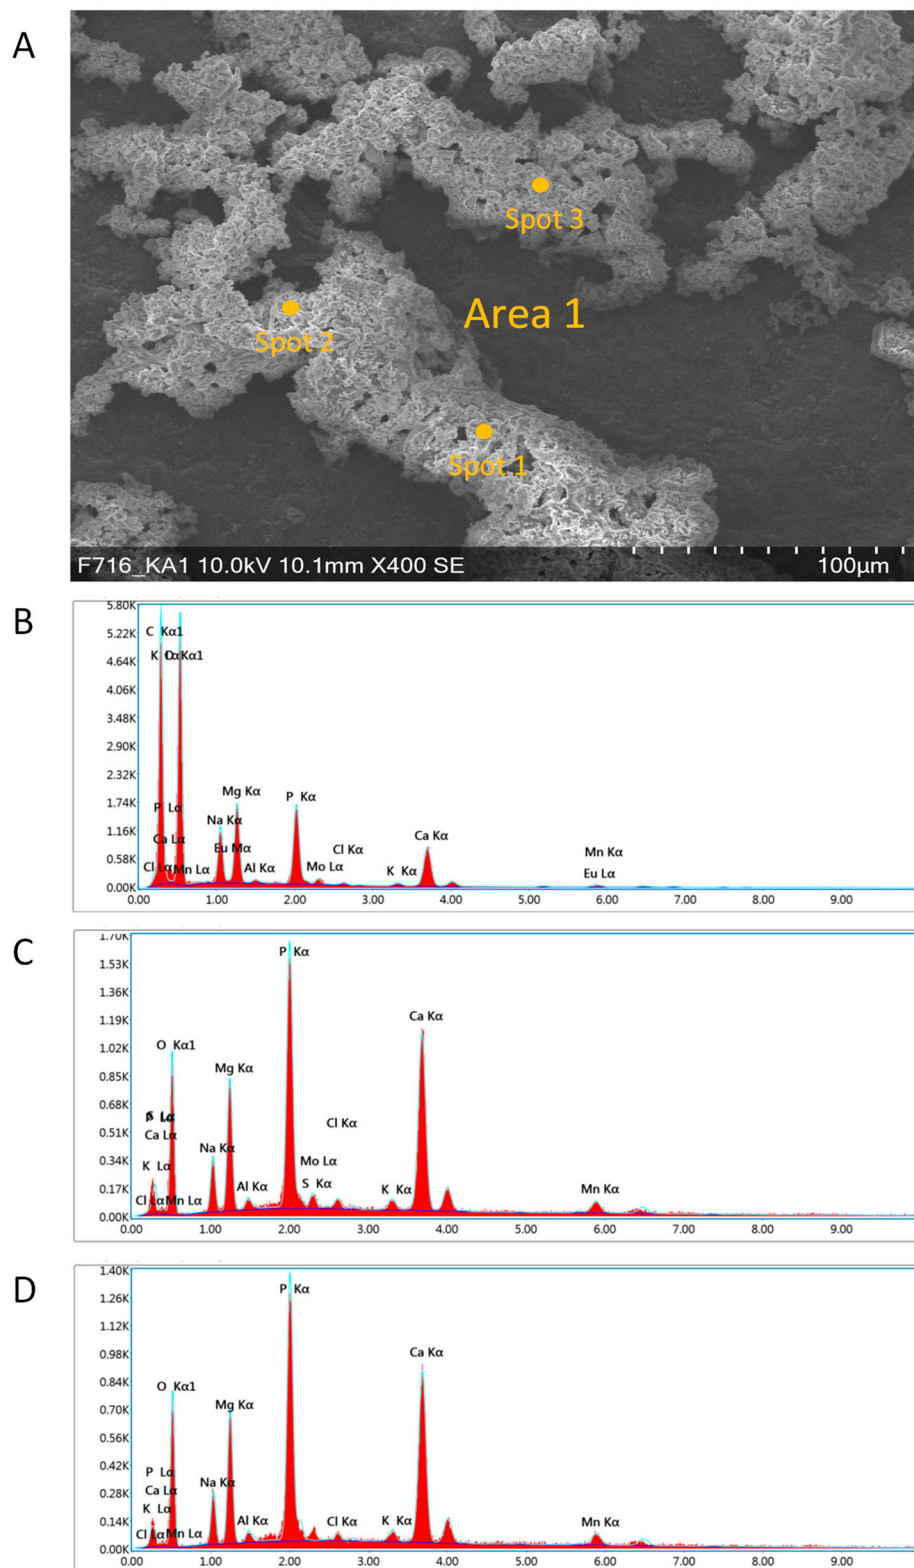

**Figure S1.** Element measurements at different spots of the electrode used during electromethanogenesis with *M. maripaludis* KA1. **(A)** SEM picture of electrode with deposits and distribution of the spots in area 1. **(B)** EDX analysis of spot 1, **(C)** EDX analysis of spot 2 and **(D)** EDX analysis of spot 3. The x-axis shows the energy in keV and the y-axis shows the total counts.

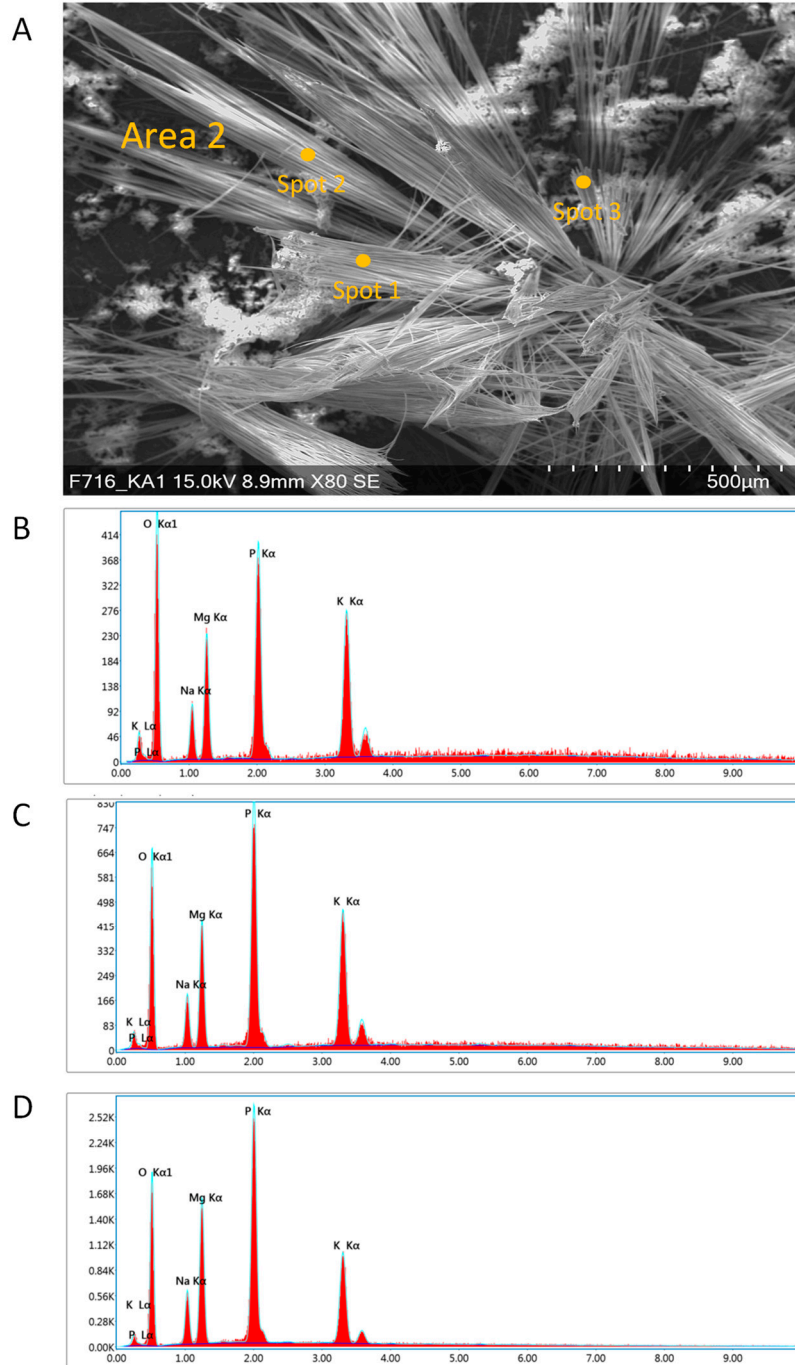

**Figure S2.** Element measurements at different spots of the electrode used during electromethanogenesis with *M. maripaludis* KA1. **(A)** SEM picture of electrode with deposits and distribution of the spots in area 2. **(B)** EDX analysis of spot 1, **(C)** EDX analysis of spot 2 and **(D)** EDX analysis of spot 3. The x-axis shows the energy in keV and the y-axis shows the total counts.

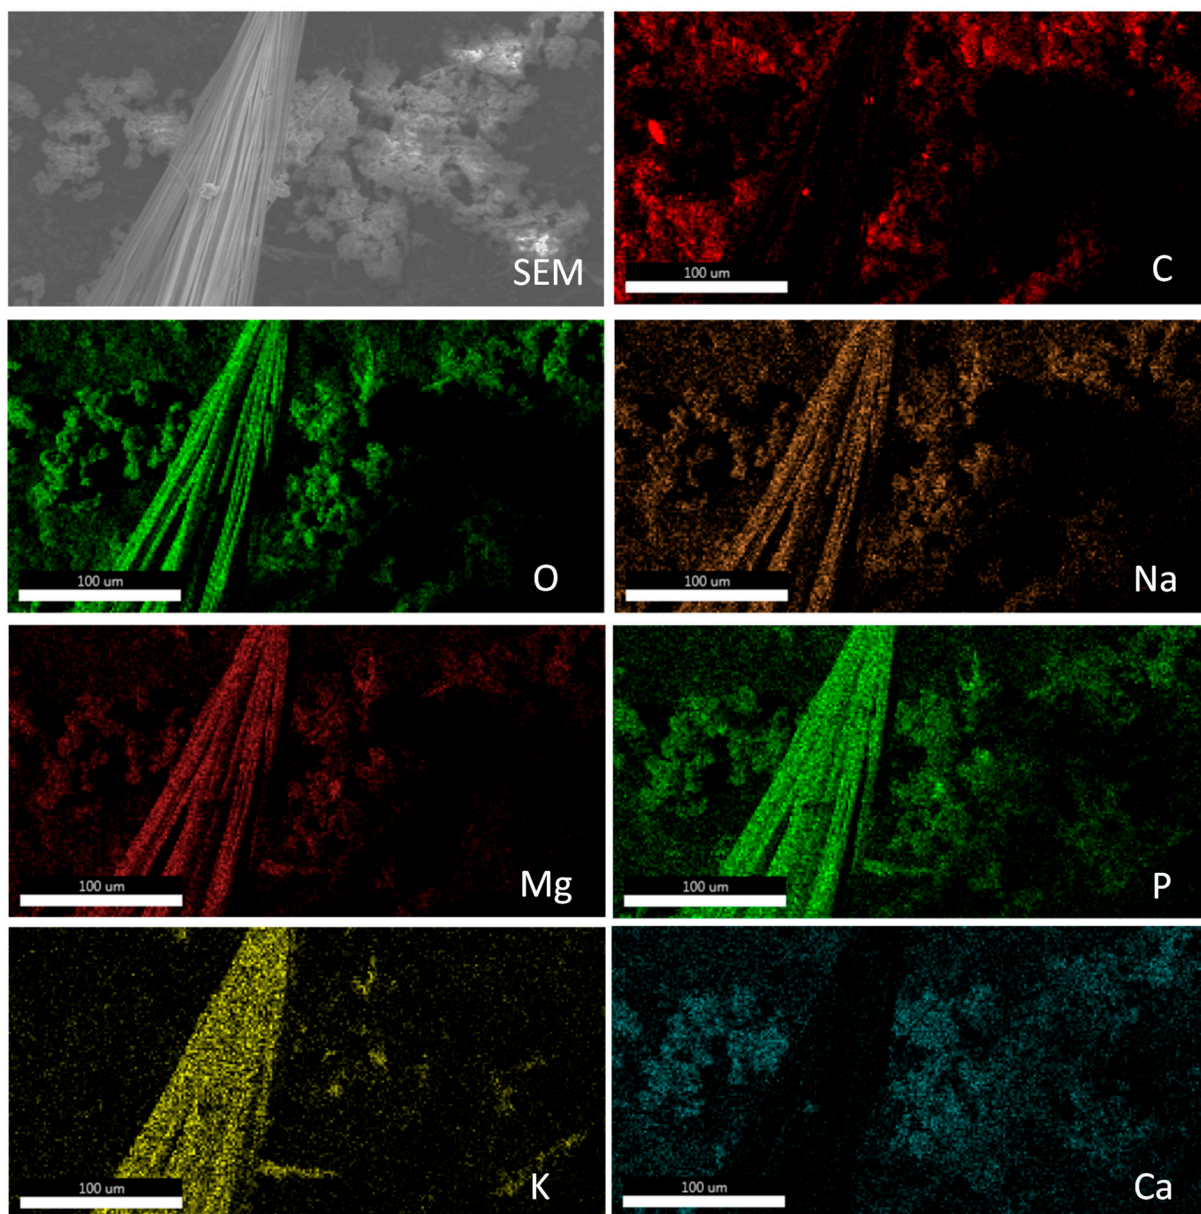

**Figure S3.** EDX mapping of an area with deposits of the electrode used during electromethanogenesis with *M. maripaludis* KA1. Different elements are shown in different colors.

**Table S1.** Additional genes in genome of *M. maripaludis* KA1 in comparison to strain S2.

| Locus tag KA1 | Gene/protein                                                                    |                    |
|---------------|---------------------------------------------------------------------------------|--------------------|
| MMKA1_RS00465 | 4Fe-4S binding protein                                                          | Electron transport |
| MMKA1_RS00470 | 4Fe-4S binding protein                                                          | Electron transport |
| MMKA1_RS00475 | 4Fe-4S binding protein                                                          | Electron transport |
| MMKA1_RS00480 | transcriptional regulator                                                       |                    |
| MMKA1_RS01060 | hypothetical protein                                                            |                    |
| MMKA1_RS01065 | hypothetical protein                                                            |                    |
| MMKA1_RS01290 | hypothetical protein                                                            |                    |
| MMKA1_RS01295 | hypothetical protein                                                            |                    |
| MMKA1_RS01300 | DUF2341 domain-containing protein                                               |                    |
| MMKA1_RS01305 | hypothetical protein                                                            |                    |
| MMKA1_RS01310 | DUF2341 domain-containing protein                                               |                    |
| MMKA1_RS01700 | hypothetical protein                                                            |                    |
| MMKA1_RS01875 | UDP-glucose/GDP-mannose dehydrogenase family protein                            |                    |
| MMKA1_RS01920 | TIGR04279 domain-containing protein                                             |                    |
| MMKA1_RS01925 | TIGR04279 domain-containing protein                                             |                    |
| MMKA1_RS01930 | hypothetical protein                                                            |                    |
| MMKA1_RS01935 | polysaccharide biosynthesis protein                                             |                    |
| MMKA1_RS01940 | LegC family aminotransferase                                                    |                    |
| MMKA1_RS01945 | Acetyltransferase                                                               |                    |
| MMKA1_RS01950 | N-acetylneuraminate synthase                                                    |                    |
| MMKA1_RS01955 | UDP-N-acetylglucosamine 2-epimerase (hydrolyzing)                               |                    |
| MMKA1_RS01960 | acylneuraminate cytidyltransferase family protein                               |                    |
| MMKA1_RS01965 | Acyltransferase                                                                 |                    |
| MMKA1_RS01970 | Flippase                                                                        |                    |
| MMKA1_RS01975 | DUF1616 domain-containing protein                                               |                    |
| MMKA1_RS01980 | hypothetical protein                                                            |                    |
| MMKA1_RS01985 | hypothetical protein                                                            |                    |
| MMKA1_RS01990 | hypothetical protein                                                            |                    |
| MMKA1_RS01995 | Glycosyltransferase                                                             |                    |
| MMKA1_RS02000 | glycosyltransferase family 9 protein                                            |                    |
| MMKA1_RS02005 | ADP-glyceromanno-heptose 6-epimerase                                            |                    |
| MMKA1_RS02010 | HAD family hydrolases                                                           |                    |
| MMKA1_RS02015 | bifunctional heptose 7-phosphate kinase/heptose 1-phosphate adenylyltransferase |                    |
| MMKA1_RS02020 | D-glycero-beta-D-manno-heptose 1-phosphate adenylyltransferase                  |                    |
| MMKA1_RS02025 | D-sedoheptulose 7-phosphate isomerase                                           |                    |
| MMKA1_RS02090 | S-layer protein                                                                 |                    |
| MMKA1_RS02305 | tetratricopeptide repeat protein                                                |                    |
| MMKA1_RS02310 | hypothetical protein                                                            |                    |
| MMKA1_RS02345 | hypothetical protein                                                            |                    |
| MMKA1_RS02500 | hypothetical protein                                                            |                    |
| MMKA1_RS02505 | hypothetical protein                                                            |                    |
| MMKA1_RS02510 | hypothetical protein                                                            |                    |
| MMKA1_RS02515 | hypothetical protein                                                            |                    |
| MMKA1_RS02520 | hypothetical protein                                                            |                    |

|               |                                                                                         |                        |
|---------------|-----------------------------------------------------------------------------------------|------------------------|
| MMKA1_RS02525 | tyrosine-type recombinase/integrase                                                     |                        |
| MMKA1_RS02530 | hypothetical protein                                                                    |                        |
| MMKA1_RS02535 | hypothetical protein                                                                    |                        |
| MMKA1_RS02540 | hypothetical protein                                                                    |                        |
| MMKA1_RS02545 | hypothetical protein                                                                    |                        |
| MMKA1_RS02550 | hypothetical protein                                                                    |                        |
| MMKA1_RS02555 | helix-turn-helix domain-containing protein                                              |                        |
| MMKA1_RS02560 | hypothetical protein                                                                    |                        |
| MMKA1_RS02565 | tetratricopeptide repeat protein                                                        |                        |
| MMKA1_RS02570 | hypothetical protein                                                                    |                        |
| MMKA1_RS02575 | hypothetical protein                                                                    |                        |
| MMKA1_RS02580 | hypothetical protein                                                                    |                        |
| MMKA1_RS02585 | recombinase family protein                                                              |                        |
| MMKA1_RS02590 | hypothetical protein                                                                    |                        |
| MMKA1_RS02595 | hypothetical protein                                                                    |                        |
| MMKA1_RS02600 | ATP-binding protein                                                                     |                        |
| MMKA1_RS02605 | hypothetical protein                                                                    |                        |
| MMKA1_RS02615 | hypothetical protein                                                                    |                        |
| MMKA1_RS02620 | hypothetical protein                                                                    |                        |
| MMKA1_RS02625 | hypothetical protein                                                                    |                        |
| MMKA1_RS02630 | hypothetical protein                                                                    |                        |
| MMKA1_RS02635 | hypothetical protein                                                                    |                        |
| MMKA1_RS02640 | hypothetical protein                                                                    |                        |
| MMKA1_RS02645 | hypothetical protein                                                                    |                        |
| MMKA1_RS02650 | hypothetical protein                                                                    |                        |
| MMKA1_RS02655 | ABC transporter substrate-binding protein                                               |                        |
| MMKA1_RS02660 | ABC transporter ATP-binding protein                                                     |                        |
| MMKA1_RS02665 | hypothetical protein                                                                    |                        |
| MMKA1_RS02670 | VWA domain-containing protein                                                           |                        |
| MMKA1_RS02675 | AAA domain-containing protein                                                           |                        |
| MMKA1_RS02680 | cobaltochelate subunit CobN                                                             |                        |
| MMKA1_RS02685 | hypothetical protein                                                                    |                        |
| MMKA1_RS02690 | hypothetical protein                                                                    |                        |
| MMKA1_RS02695 | hypothetical protein                                                                    |                        |
| MMKA1_RS02700 | PKD domain-containing protein                                                           |                        |
| MMKA1_RS02705 | ABC transporter substrate-binding protein                                               |                        |
| MMKA1_RS02710 | iron ABC transporter permease                                                           | Diffusion of molecules |
| MMKA1_RS02715 | iron ABC transporter permease                                                           | Diffusion of molecules |
| MMKA1_RS02720 | TIM barrel protein                                                                      |                        |
| MMKA1_RS02725 | bifunctional adenosylcobinamide kinase/adenosylcobinamide-phosphate guanylyltransferase |                        |
| MMKA1_RS02730 | MarR family transcriptional regulator                                                   |                        |
| MMKA1_RS02735 | hypothetical protein                                                                    |                        |
| MMKA1_RS02740 | FRG domain-containing protein                                                           |                        |
| MMKA1_RS02745 | hypothetical protein                                                                    |                        |
| MMKA1_RS02750 | hypothetical protein                                                                    |                        |
| MMKA1_RS02820 | hypothetical protein                                                                    |                        |
| MMKA1_RS03130 | hypothetical protein                                                                    |                        |
| MMKA1_RS03330 | class III signal peptide-containing protein                                             |                        |
| MMKA1_RS03730 | hypothetical protein                                                                    |                        |
| MMKA1_RS04040 | tRNA-Ser                                                                                |                        |



|               |                                                                         |  |
|---------------|-------------------------------------------------------------------------|--|
| MMKA1 RS04045 | site-specific integrase                                                 |  |
| MMKA1 RS04050 | hypothetical protein                                                    |  |
| MMKA1 RS04055 | hypothetical protein                                                    |  |
| MMKA1 RS04060 | site-specific integrase                                                 |  |
| MMKA1 RS04065 | DUF2540 domain-containing protein                                       |  |
| MMKA1 RS04070 | hypothetical protein                                                    |  |
| MMKA1 RS04075 | nucleotidyltransferase family protein                                   |  |
| MMKA1 RS04080 | nucleotidyltransferase family protein                                   |  |
| MMKA1 RS04085 | Fic family protein                                                      |  |
| MMKA1 RS04090 | Nucleotidyltransferase                                                  |  |
| MMKA1 RS04095 | hypothetical protein                                                    |  |
| MMKA1 RS04100 | GIY-YIG nuclease family protein                                         |  |
| MMKA1 RS04105 | winged helix DNA-binding protein                                        |  |
| MMKA1 RS04110 | ATP-dependent DNA helicase                                              |  |
| MMKA1 RS04115 | DEAD/DEAH box helicase                                                  |  |
| MMKA1 RS04120 | hypothetical protein                                                    |  |
| MMKA1 RS04125 | M48 family metalloproteinase                                            |  |
| MMKA1 RS04130 | type I restriction endonuclease subunit R                               |  |
| MMKA1 RS04135 | hypothetical protein                                                    |  |
| MMKA1 RS04140 | hypothetical protein                                                    |  |
| MMKA1 RS04145 | type I restriction-modification system subunit M                        |  |
| MMKA1 RS04150 | restriction endonuclease subunit S                                      |  |
| MMKA1 RS04155 | EVE domain-containing protein                                           |  |
| MMKA1 RS04160 | hypothetical protein                                                    |  |
| MMKA1 RS04165 | hypothetical protein                                                    |  |
| MMKA1 RS04170 | DUF2975 domain-containing protein                                       |  |
| MMKA1 RS04175 | hypothetical protein                                                    |  |
| MMKA1 RS04180 | DUF262 domain-containing protein                                        |  |
| MMKA1 RS04185 | hypothetical protein                                                    |  |
| MMKA1 RS04190 | hypothetical protein                                                    |  |
| MMKA1 RS04195 | hypothetical protein                                                    |  |
| MMKA1_RS04200 | type II toxin-antitoxin system mRNA interferase toxin, RelE/StbE family |  |
| MMKA1 RS04205 | DUF3883 domain-containing protein                                       |  |
| MMKA1 RS04210 | hypothetical protein                                                    |  |
| MMKA1 RS04215 | BREX system P-loop protein BrxC                                         |  |
| MMKA1 RS04220 | DUF1819 family protein                                                  |  |
| MMKA1 RS04225 | CRISPR locus-related DNA-binding protein                                |  |
| MMKA1 RS04230 | ATP-dependent helicase                                                  |  |
| MMKA1 RS04235 | thermonuclease family protein                                           |  |
| MMKA1 RS04240 | hypothetical protein                                                    |  |
| MMKA1 RS04245 | YjzC family protein                                                     |  |
| MMKA1 RS04250 | hypothetical protein                                                    |  |
| MMKA1 RS04255 | hypothetical protein                                                    |  |
| MMKA1 RS04260 | DUF4263 domain-containing protein                                       |  |
| MMKA1 RS04265 | DEAD/DEAH box helicase                                                  |  |
| MMKA1 RS04270 | 3'-5' exonuclease                                                       |  |
| MMKA1 RS04275 | hypothetical protein                                                    |  |
| MMKA1 RS04280 | recombinase family protein                                              |  |
| MMKA1 RS04285 | hypothetical protein                                                    |  |
| MMKA1 RS04290 | DUF2683 family protein                                                  |  |
| MMKA1 RS04295 | hypothetical protein                                                    |  |
| MMKA1 RS04300 | AAA family ATPase                                                       |  |
| MMKA1 RS04305 | flavodoxin family protein                                               |  |

|               |                                                      |  |
|---------------|------------------------------------------------------|--|
| MMKA1_RS04310 | calcium/sodium antiporter                            |  |
| MMKA1_RS04315 | hypothetical protein                                 |  |
| MMKA1_RS04320 | KamA family radical SAM protein                      |  |
| MMKA1_RS04325 | GNAT family N-acetyltransferase                      |  |
| MMKA1_RS04330 | site-specific integrase                              |  |
| MMKA1_RS04335 | hypothetical protein                                 |  |
| MMKA1_RS04340 | ABC transporter permease                             |  |
| MMKA1_RS04345 | DUF4013 domain-containing protein                    |  |
| MMKA1_RS04350 | WYL domain-containing protein                        |  |
| MMKA1_RS04355 | hypothetical protein                                 |  |
| MMKA1_RS04360 | trypsin-like peptidase domain-containing protein     |  |
| MMKA1_RS04365 | hypothetical protein                                 |  |
| MMKA1_RS04370 | hypothetical protein                                 |  |
| MMKA1_RS04435 | flavodoxin family protein                            |  |
| MMKA1_RS04500 | radical SAM protein                                  |  |
| MMKA1_RS04505 | hypothetical protein                                 |  |
| MMKA1_RS04510 | hypothetical protein                                 |  |
| MMKA1_RS04515 | RHS repeat-associated core domain-containing protein |  |
| MMKA1_RS04520 | hypothetical protein                                 |  |
| MMKA1_RS04525 | RHS repeat-associated core domain-containing protein |  |
| MMKA1_RS04530 | hypothetical protein                                 |  |
| MMKA1_RS04535 | hypothetical protein                                 |  |
| MMKA1_RS04540 | hypothetical protein                                 |  |
| MMKA1_RS04545 | hypothetical protein                                 |  |
| MMKA1_RS04550 | hypothetical protein                                 |  |
| MMKA1_RS04555 | hypothetical protein                                 |  |
| MMKA1_RS04560 | hypothetical protein                                 |  |
| MMKA1_RS04565 | RHS repeat-associated core domain-containing protein |  |
| MMKA1_RS04570 | hypothetical protein                                 |  |
| MMKA1_RS04575 | hypothetical protein                                 |  |
| MMKA1_RS04580 | hypothetical protein                                 |  |
| MMKA1_RS04630 | formylmethanofuran dehydrogenase subunit B           |  |
| MMKA1_RS04730 | N-6 DNA methylase                                    |  |
| MMKA1_RS04735 | DUF2283 domain-containing protein                    |  |
| MMKA1_RS04740 | hypothetical protein                                 |  |
| MMKA1_RS04745 | Integrase                                            |  |
| MMKA1_RS04875 | hypothetical protein                                 |  |
| MMKA1_RS04880 | hypothetical protein                                 |  |
| MMKA1_RS04885 | hypothetical protein                                 |  |
| MMKA1_RS04920 | S-layer protein                                      |  |
| MMKA1_RS05315 | hypothetical protein                                 |  |
| MMKA1_RS05320 | tyrosine-type recombinase/integrase                  |  |
| MMKA1_RS05325 | helix-turn-helix transcriptional regulator           |  |
| MMKA1_RS05330 | hypothetical protein                                 |  |
| MMKA1_RS05335 | hypothetical protein                                 |  |
| MMKA1_RS05340 | hypothetical protein                                 |  |
| MMKA1_RS05345 | CRISPR-associated endonuclease Cas6                  |  |
| MMKA1_RS05350 | CRISPR-associated helicase Cas3'                     |  |
| MMKA1_RS05355 | type I-B CRISPR-associated protein Cas5              |  |
| MMKA1_RS05360 | type I-B CRISPR-associated protein Cas7/Csh2         |  |
| MMKA1_RS05365 | TIGR02556 family CRISPR-associated protein           |  |

|               |                                                                   |                               |
|---------------|-------------------------------------------------------------------|-------------------------------|
| MMKA1_RS05370 | CRISPR-associated endonuclease Cas1                               |                               |
| MMKA1_RS05375 | CRISPR-associated endonuclease Cas2                               |                               |
| MMKA1_RS05380 | CRISPR-associated protein Cas4                                    |                               |
| MMKA1_RS05450 | formylmethanofuran dehydrogenase                                  |                               |
| MMKA1_RS05455 | FprA family A-type flavoprotein                                   |                               |
| MMKA1_RS05460 | YgiQ family radical SAM protein                                   |                               |
| MMKA1_RS05465 | phosphoenolpyruvate carboxylase                                   |                               |
| MMKA1_RS05470 | hydroxyethylthiazole kinase                                       |                               |
| MMKA1_RS05475 | thiamine phosphate synthase                                       |                               |
| MMKA1_RS05480 | hypothetical protein                                              |                               |
| MMKA1_RS05485 | formylmethanofuran dehydrogenase subunit A                        |                               |
| MMKA1_RS05490 | formylmethanofuran dehydrogenase subunit C                        |                               |
| MMKA1_RS05495 | 4Fe-4S binding protein                                            | Electron transport            |
| MMKA1_RS05500 | 4Fe-4S dicluster domain-containing protein                        | Electron transport            |
| MMKA1_RS05505 | hypothetical protein                                              |                               |
| MMKA1_RS05510 | ATP-binding cassette domain-containing protein                    |                               |
| MMKA1_RS05515 | hypothetical protein                                              |                               |
| MMKA1_RS05520 | formylmethanofuran dehydrogenase subunit B                        |                               |
| MMKA1_RS05525 | formylmethanofuran dehydrogenase subunit B                        |                               |
| MMKA1_RS05530 | hypothetical protein                                              |                               |
| MMKA1_RS05535 | CO dehydrogenase/acetyl-CoA synthase complex subunit epsilon      |                               |
| MMKA1_RS05540 | CO dehydrogenase/acetyl-CoA synthase complex subunit epsilon      |                               |
| MMKA1_RS05545 | threonylcarbamoyl-AMP synthase                                    |                               |
| MMKA1_RS05550 | 4Fe-4S dicluster domain-containing protein                        | Electron transport            |
| MMKA1_RS05555 | hypothetical protein                                              |                               |
| MMKA1_RS05560 | 2-oxoglutarate ferredoxin oxidoreductase subunit gamma            | Ferredoxin-containing protein |
| MMKA1_RS05565 | 2-oxoacid:ferredoxin oxidoreductase subunit beta                  | Ferredoxin-containing protein |
| MMKA1_RS05570 | 2-oxoacid:acceptor oxidoreductase subunit alpha                   | Ferredoxin-containing protein |
| MMKA1_RS05575 | ferredoxin family protein                                         | Ferredoxin-containing protein |
| MMKA1_RS05580 | 4Fe-4S binding protein                                            | Electron transport            |
| MMKA1_RS05585 | 4Fe-4S binding protein                                            | Electron transport            |
| MMKA1_RS05590 | 5-(carboxyamino)imidazole ribonucleotide mutase                   |                               |
| MMKA1_RS05595 | MTH1187 family thiamine-binding protein                           |                               |
| MMKA1_RS05600 | carbonic anhydrase                                                |                               |
| MMKA1_RS05605 | phosphoribosylaminoimidazolesuccinocarboxamide synthase           |                               |
| MMKA1_RS05610 | chemotaxis protein                                                |                               |
| MMKA1_RS05615 | carbamoyl-phosphate synthase large subunit                        |                               |
| MMKA1_RS05620 | glutamine-hydrolyzing carbamoyl-phosphate synthase small subunit  |                               |
| MMKA1_RS05625 | pyruvate synthase subunit beta                                    |                               |
| MMKA1_RS05630 | 2-ketoisovalerate ferredoxin oxidoreductase subunit alpha (=porA) | Ferredoxin-containing protein |
| MMKA1_RS05635 | 4Fe-4S binding protein                                            | Electron transport            |
| MMKA1_RS05640 | pyruvate ferredoxin oxidoreductase subunit gamma                  |                               |
| MMKA1_RS05645 | Permease                                                          |                               |
| MMKA1_RS05650 | 4Fe-4S binding protein                                            | Electron transport            |



|               |                                                                           |            |
|---------------|---------------------------------------------------------------------------|------------|
| MMKA1_RS05655 | molybdate ABC transporter substrate-binding protein                       |            |
| MMKA1_RS05825 | hypothetical protein                                                      |            |
| MMKA1_RS05830 | hypothetical protein                                                      |            |
| MMKA1_RS05835 | hypothetical protein                                                      |            |
| MMKA1_RS06040 | N-6 DNA methylase                                                         |            |
| MMKA1_RS06045 | restriction endonuclease                                                  |            |
| MMKA1_RS06145 | hypothetical protein                                                      |            |
| MMKA1_RS06150 | hypothetical protein                                                      |            |
| MMKA1_RS06155 | endonuclease III                                                          |            |
| MMKA1_RS06160 | hypothetical protein                                                      |            |
| MMKA1_RS06165 | hypothetical protein                                                      |            |
| MMKA1_RS06170 | hypothetical protein                                                      |            |
| MMKA1_RS06175 | hypothetical protein                                                      | MIC island |
| MMKA1_RS06180 | hypothetical protein                                                      | MIC island |
| MMKA1_RS06185 | hydrogenase maturation protease                                           | MIC island |
| MMKA1_RS06190 | twin-arginine translocase subunit TatC                                    | MIC island |
| MMKA1_RS06195 | twin-arginine translocase TatA/TatE family subunit                        | MIC island |
| MMKA1_RS06200 | carbonic anhydrase                                                        | MIC island |
| MMKA1_RS06205 | PAS domain S-box protein                                                  |            |
| MMKA1_RS06325 | mannose-1-phosphate guanylyltransferase/<br>mannose-6-phosphate isomerase |            |
| MMKA1_RS06330 | glycosyltransferase family 4 protein                                      |            |
| MMKA1_RS06335 | glycosyltransferase family 4 protein                                      |            |
| MMKA1_RS06340 | glycosyltransferase family 2 protein                                      |            |
| MMKA1_RS06545 | ABC transporter substrate-binding protein                                 |            |
| MMKA1_RS06550 | ABC transporter permease                                                  |            |
| MMKA1_RS06555 | ABC transporter permease                                                  |            |
| MMKA1_RS06560 | ABC transporter ATP-binding protein                                       |            |
| MMKA1_RS06565 | ATP-binding cassette domain-containing protein                            |            |
| MMKA1_RS07110 | cobalt-precorrin-7 (C(5))-methyltransferase                               |            |
| MMKA1_RS07115 | hypothetical protein                                                      |            |
| MMKA1_RS07120 | hypothetical protein                                                      |            |
| MMKA1_RS07125 | hypothetical protein                                                      |            |
| MMKA1_RS07130 | HAD family hydrolases                                                     |            |
| MMKA1_RS07135 | phosphoadenosine phosphosulfate reductase<br>family protein               |            |
| MMKA1_RS07140 | formate dehydrogenase accessory sulfurtransferase<br>FdhD                 |            |
| MMKA1_RS07145 | HesA/MoeB/ThiF family protein                                             |            |
| MMKA1_RS07150 | molybdenum cofactor biosynthesis protein MoaE                             |            |
| MMKA1_RS07155 | UPF0280 family protein                                                    |            |
| MMKA1_RS07160 | hypothetical protein                                                      |            |
| MMKA1_RS07165 | biotin synthase BioB                                                      |            |
| MMKA1_RS07170 | ATP-dependent sacrificial sulfur transferase LarE                         |            |
| MMKA1_RS07175 | O-phospho-L-seryl-tRNA:Cys-tRNA synthase                                  |            |
| MMKA1_RS07180 | hypothetical protein                                                      |            |
| MMKA1_RS07185 | quinolinate synthase NadA                                                 |            |
| MMKA1_RS07190 | hypothetical protein                                                      |            |
| MMKA1_RS07195 | cobalt-precorrin-7 (C(5))-methyltransferase                               |            |
| MMKA1_RS07200 | hypothetical protein                                                      |            |
| MMKA1_RS07205 | hypothetical protein                                                      |            |
| MMKA1_RS07210 | hypothetical protein                                                      |            |
| MMKA1_RS07215 | HAD family hydrolases                                                     |            |

|               |                                                         |  |
|---------------|---------------------------------------------------------|--|
| MMKA1_RS07220 | phosphoadenosine phosphosulfate reductase familyprotein |  |
| MMKA1_RS07225 | formate dehydrogenase accessory sulfurtransferase FdhD  |  |
| MMKA1_RS07230 | HesA/MoeB/ThiF family protein                           |  |
| MMKA1_RS07235 | molybdenum cofactor biosynthesis protein MoaE           |  |
| MMKA1_RS07240 | UPF0280 family protein                                  |  |
| MMKA1_RS07245 | hypothetical protein                                    |  |
| MMKA1_RS07250 | biotin synthase BioB                                    |  |
| MMKA1_RS07255 | ATP-dependent sacrificial sulfur transferase LarE       |  |
| MMKA1_RS07260 | O-phospho-L-seryl-tRNA:Cys-tRNA synthase                |  |
| MMKA1_RS07265 | hypothetical protein                                    |  |
| MMKA1_RS07270 | quinolinate synthase NadA                               |  |
| MMKA1_RS07275 | hypothetical protein                                    |  |
| MMKA1_RS07280 | cobalt-precorrin-7 (C(5))-methyltransferase             |  |
| MMKA1_RS07285 | hypothetical protein                                    |  |
| MMKA1_RS07290 | hypothetical protein                                    |  |
| MMKA1_RS07295 | hypothetical protein                                    |  |
| MMKA1_RS07300 | HAD family hydrolases                                   |  |
| MMKA1_RS07305 | phosphoadenosine phosphosulfate reductase familyprotein |  |
| MMKA1_RS07310 | formate dehydrogenase accessory sulfurtransferase FdhD  |  |
| MMKA1_RS07315 | HesA/MoeB/ThiF family protein                           |  |
| MMKA1_RS07320 | molybdenum cofactor biosynthesis protein MoaE           |  |
| MMKA1_RS07325 | UPF0280 family protein                                  |  |
| MMKA1_RS07330 | hypothetical protein                                    |  |
| MMKA1_RS07335 | biotin synthase BioB                                    |  |
| MMKA1_RS07340 | ATP-dependent sacrificial sulfur transferase LarE       |  |
| MMKA1_RS07345 | O-phospho-L-seryl-tRNA:Cys-tRNA synthase                |  |
| MMKA1_RS07350 | hypothetical protein                                    |  |
| MMKA1_RS07355 | quinolinate synthase NadA                               |  |
| MMKA1_RS07360 | hypothetical protein                                    |  |
| MMKA1_RS08615 | S-layer protein                                         |  |
| MMKA1_RS08705 | amino acid ABC transporter substrate-binding protein    |  |
| MMKA1_RS08710 | hypothetical protein                                    |  |
| MMKA1_RS08745 | hypothetical protein                                    |  |
| MMKA1_RS08750 | DUF2226 domain-containing protein                       |  |
| MMKA1_RS08810 | hypothetical protein                                    |  |
| MMKA1_RS09655 | class III signal peptide-containing protein             |  |
